# Supplementary material for: Size-tunable synthesis of lanthanide-doped Gd2O3nanoparticles and their applications for optical and magnetic resonance imaging
Source: Royal Society of Chemistry journal article supplement (doi:10.1039/c1jm13758a), 2011-11-17
Supplement: c1jm13758a.pdf [file c1jm13758a.pdf]

# Supporting Information

Size-tunable synthesis of lanthanide-doped Gd<sub>2</sub>O<sub>3</sub> nanoparticles  
and their applications for optical and magnetic resonance  
imaging

Liangjun Zhou<sup>a,c</sup>, Zhanjun Gu<sup>a\*</sup>, Xiaoxiao Liu<sup>a</sup>, Wenyan Yin<sup>a</sup>, Gan Tian<sup>ad</sup>, Liang Yan<sup>a</sup>,  
Shan Jin<sup>ac</sup>, Wenlu Ren<sup>a</sup>, Gengmei Xing<sup>a</sup>, Wei Li<sup>a</sup>, Xueling Chang<sup>a</sup>, Zhongbo Hu<sup>c</sup>,  
Yuliang Zhao<sup>ab\*</sup>

<sup>a</sup>Key Laboratory for Biomedical Effects of Nanomaterials and Nanosafety,  
Institute of High Energy Physics, Chinese Academy of Sciences, Beijing 100049, P.  
R.China

<sup>b</sup> Key Laboratory for Biomedical Effects of Nanomaterials and Nanosafety,  
National Center for Nanosciences and Technology of China, Beijing, 100190,  
China.

<sup>c</sup>College of Materials Science and Opto-Electronic Technology, Graduate University  
of Chinese Academy of Sciences, Beijing 100049, P. R.China

<sup>d</sup>College of Chemistry, Sichuan University, Chengdu, 610064, P. R. China

\*Corresponding Authors: zjgu@ihep.ac.cn, zhaoyuliang@ihep.ac.cn

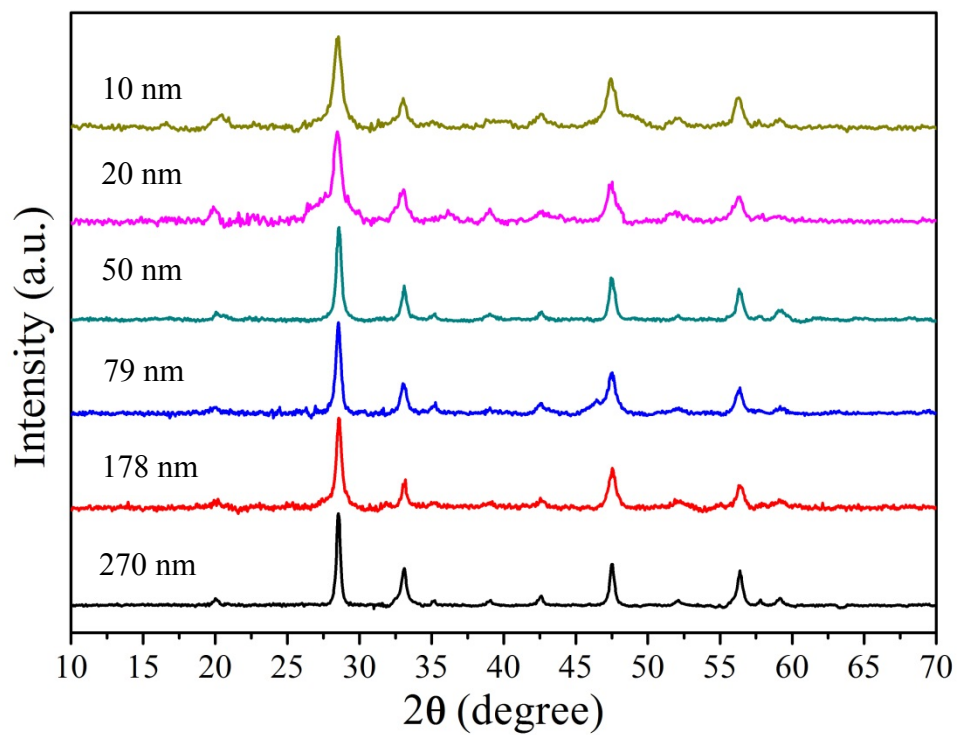

Figure S1. XRD patterns of Gd<sub>2</sub>O<sub>3</sub>: Yb, Er nanoparticles with different sizes.

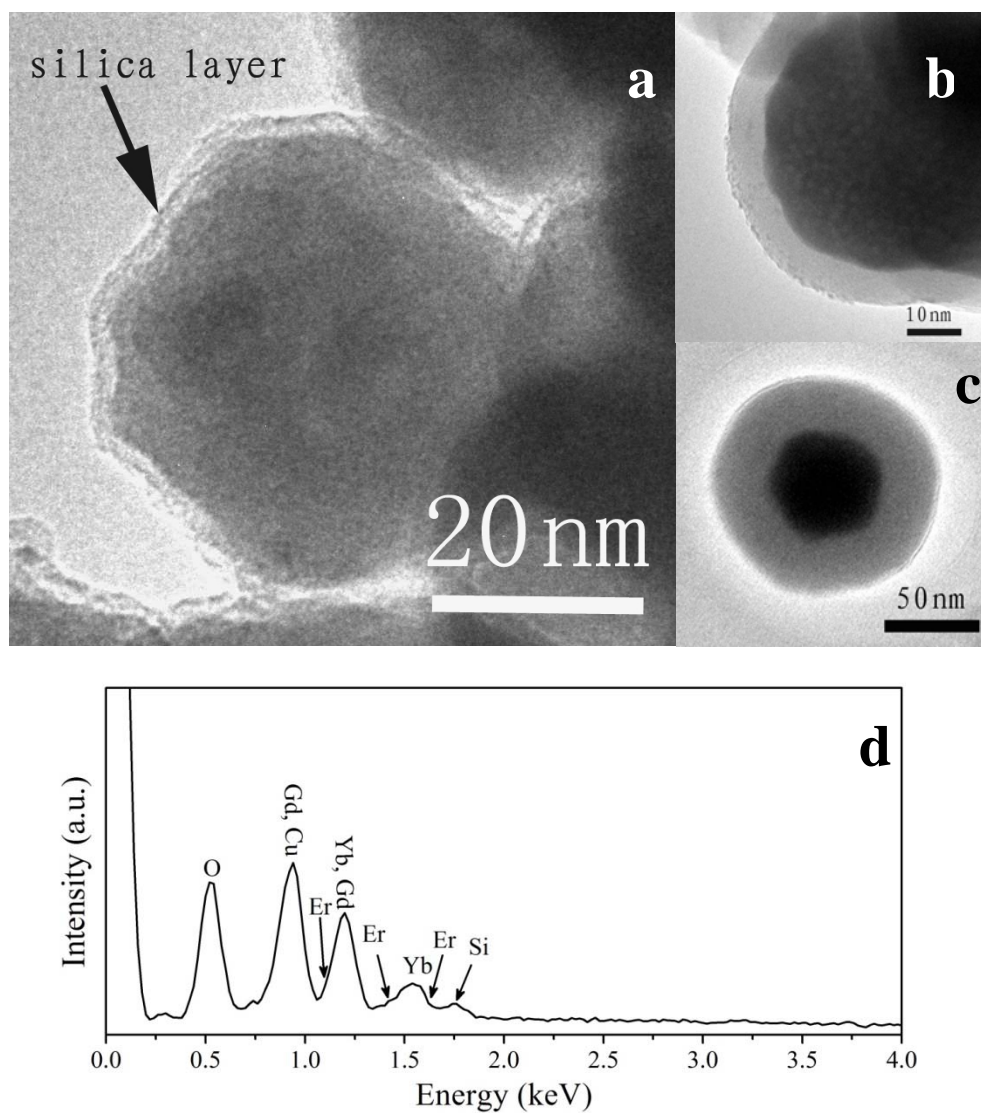

Figure S2. TEM images (a-c) of Gd<sub>2</sub>O<sub>3</sub> nanoparticles coated with different thickness of silica layer. (d) The EDX spectrum obtained from Gd<sub>2</sub>O<sub>3</sub>: Yb, Er NPs coated with silica. Si signal comes from the silica layer and Cu signal comes from the Cu support substrate.

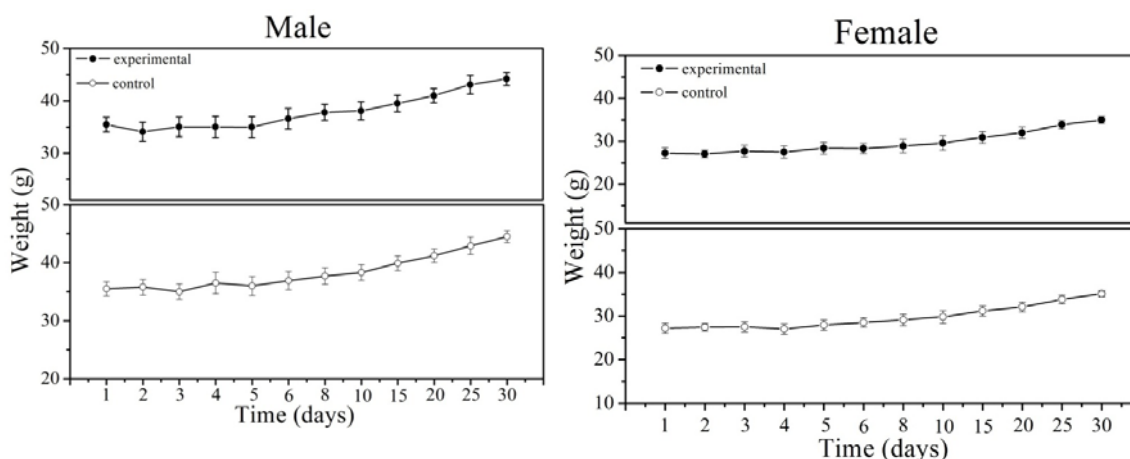

Figure S3. White Kunming mice were used to test the toxicity *in vivo* of  $Gd_2O_3: Yb, Er$  NPs.  $100\mu L$  of these nanoparticles dispersed in physiological saline ( $1\text{ mg}\cdot\text{mL}^{-1}$ ) were injected into both male and female mice very day (the number of mice in each group is 6) and the weights of mice are recorded at several time-points as shown in Figure S3.

Inductively coupled plasma mass spectrometry (ICP-MS, Thermo element X7) was used to determine the actual mole ratio of the lanthanide doped  $Gd_2O_3$  nanoparticles. From the ICP-MS data, the actual mole ratio of  $Gd^{3+}: Yb^{3+}: Er^{3+}$  is determined to be about 88.7:9.7:1 for the  $Gd_2O_3:10\%Yb,1\%Er$  sample, which is in good agreement with the designed nominal composition. Similar results have also been obtained for  $Gd_2O_3:1\%Er$  and  $Gd_2O_3:10\%Yb, 0.2\%Tm$  samples. The actual mole ratio of  $Gd^{3+}: Er^{3+}$  for  $Gd_2O_3:1\%Er$  sample and  $Gd^{3+}: Yb^{3+}: Tm^{3+}$  for  $Gd_2O_3:10\%Yb, 0.2\%Tm$  is 98.7: 1 and 88.6:10:0.022, respectively.
